# Supplementary material
Source: PubMed Central journal article supplement (PMC2811237)

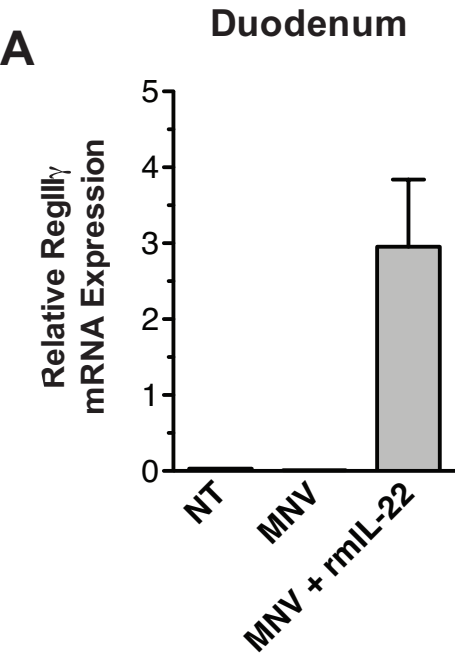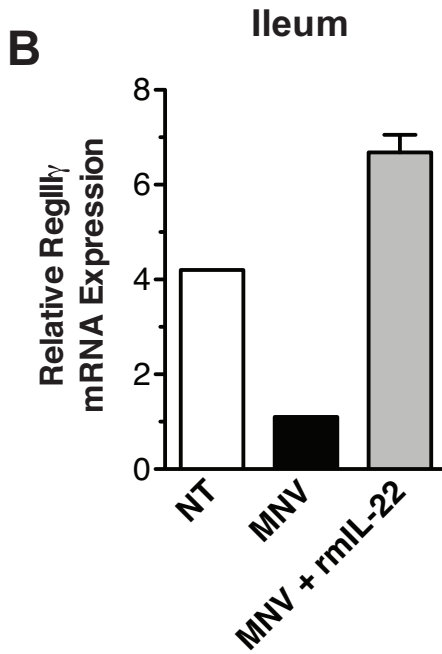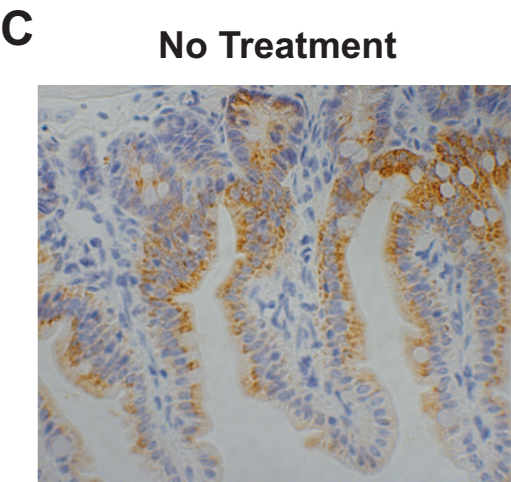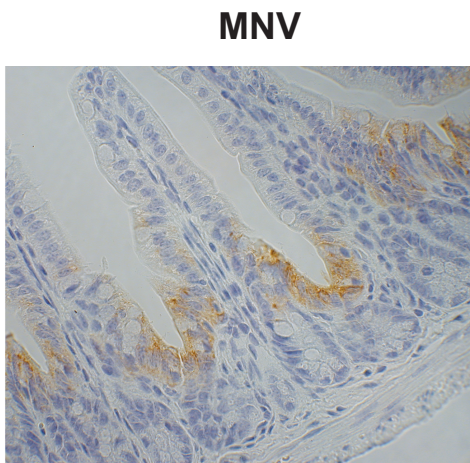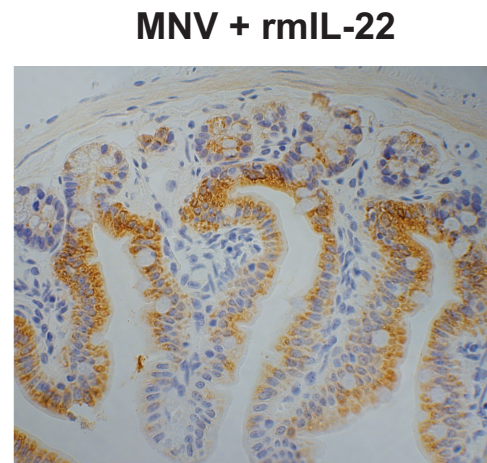

Supplement: NIHMS161080-supplement-S1.pdf [file NIHMS161080-supplement-S1.pdf]
